# Lateral pressure profile in bent lipid membranes and mechanosensitive channels gating

Anna A. Drozdova<sup>1,a</sup> and Sergei I. Mukhin<sup>1</sup>

<sup>1</sup>Department of Theoretical Physics and Quantum Technologies,

Moscow institute for Steel and Alloys,

4 Leninsky prospekt, 119049, Moscow, Russia

## Abstract

This review describes the analytical calculation of lateral pressure profile in the hydrophobic part of the lipid bilayer with finite curvature based on previously developed microscopic model for lipid hydrocarbon chains. According to this theory the energy per unit chain is represented as energy of flexible string (Euler's elastic beam of finite thickness) and interaction between chains is considered as an entropic repulsion. This microscopic theory allows to obtain expression for lateral pressure distribution in bent bilayer if treating a bending as a small deviation from the flat membrane conformation and using perturbation theory. Because lateral pressure distribution is related to elastic properties of lipid bilayer then the first moment of lateral pressure and the expression for bending modulus may be derived from this theoretical model. Finally one can estimate the energy difference between two various conformational states of mechanosensitive channel embedded into the bilayer with pressure profile  $\Pi_l(z)$ .

The relevance of the present study is supported by the fact that biological membranes constitute complex supramolecular structures that surround all living cells and form them in closed organelles. The basic structural element of the membrane is lipid bilayer, whose mechanical and thermodynamical properties are believed to play important role in the functioning of organized matter.

The lipids have one polar (hydrophilic) “head” and two non-polar (hydrophobic) hydrocarbon “tails” (chains). There is a great variety of membrane constituents and lipid characteristics (head group type, chain length, etc). Our analytical theory of lipid membranes, based on the microscopic model, was developed in [1,2]. In this model each lipid chain is modeled as a flexible string of finite thickness (incompressible area per chain) with given bending rigidity (the case of persistence length comparable with the chain full length). The ensemble of chains is investigated within a mean-field approximation with respect to the strings collisions. According to this approximation a steric (entropic) repulsion between the lipid tails is represented with an effective lateral potential acting on each string in each monolayer. The negative lateral tension keeping all the strings (i.e. lipids) together comes from hydrophobic-hydrophilic interface in the head-groups area of a membrane and is treated as an input parameter of the model. So, the energy functional for a lipid chain can be written analytically and then partition function and free energy of the chain can be estimated. The strength of the effective lateral potential acting on each string, that minimizes the free energy, is found then in a self-consistent (mean-field) manner. The analytical expression of the free energy allows to obtain different macroscopic characteristics of lipid bilayer, particularly, the lateral pressure profile that proves to be very important feature of lipid membrane because it is related to the elastic properties of lipid bilayer [3] and also the functionality of mechanosensitive ion channels [4, 5, 6].

Mechanosensitivity is a general sensory mechanism found in living organisms. It's known that the functionality of many membrane proteins, such as MscS (mechanosensitive ion channels of small conductance), and the most studied bacterial membrane protein MscL (mechanosensitive ion channel of large conductance), is sensitive to the lipid environment [7, 8, 9] and form mechanically gated channels when they embedded in a lipid bilayer. In each organism mechanosensitive channels (MSCs) perform the certain functions. For people MSCs are responsible for the regulation of blood

pressure, take hearing and vestibular function, and also play a role of touch receptors [10].

Because mechanosensitive channels are inserted in a lipid bilayer, they are sensitive to its deformations [11]. MSCs respond to mechanical stress by changing of the channel shape between the closed and open state. The change in external dimensions between the closed and open states associated with the opening of a pore in MSC. [9], [12].

Lateral pressure profile have been suggested to play a significant role in activation of mechanosensitive channel through changes in its conformational state [13, 14, 15]. The problem is that experimental studies of the lateral pressure are rare and indirect [16]. So in this research we focus on analytical derivation of expression for the lateral pressure and comparison our results with computational calculations of other colleagues.

Our microscopic theory is quite general, but for comparison of the analytically obtained lateral pressure with experimental data we use the reference typical microscopic parameters of e.g. DPPC lipids: the monolayer thickness  $L_0=1,5\text{ nm}$  , incompressible area per chain  $A_0=0,2\text{ nm}^2$  . The flexural rigidity of a lipid tail can be evaluated then from the Flory's polymer theory:  $K_f \approx k_B T_0 L_0/3$  , where temperature is  $T_0=300\text{ K}$  . To compare with experiment the analytically obtained values for the first moment of the lateral pressure  $\kappa_m J_s$  (here  $\kappa_m$  is the monolayer bending modulus and  $J_s$  is the monolayer spontaneous curvature), and bending modulus of bilayers  $\kappa_b$  we calculate parameters of lipid molecules for different fully saturated lipids. Also we calculated a work associated with embedding the mechanosensitive channel in its different conformational states into various lipid bilayers. Obtained expression depends on inter-facial surface tension, the channel area change in region between hydrophobic interior and the aqueous surroundings and also the bending modulus and spontaneous bending moment.

## Methods. Microscopic model of the lipid bilayer

Microscopic model of lipid membrane as an ensemble of flexible strings was investigated in [1,2]. Below we describe the basic statements of our theoretical model.

Hydrocarbon lipid chain is considered as Euler's elastic beam of finite thickness (see fig. 1), and its energy functional is written in the following form:

$$E_t = \int_0^{L_0} \left( \frac{\rho \dot{R}^2(z)}{2} + \frac{K_f}{2} \left( \frac{\partial^2 R(z)}{\partial z^2} \right)^2 + \frac{B}{2} R^2(z) \right) dz, \quad (1)$$

here  $R(z)$  is the deviation of the beam from the straight line at each level  $z$ ,  $L_0$  - the monolayer thickness.

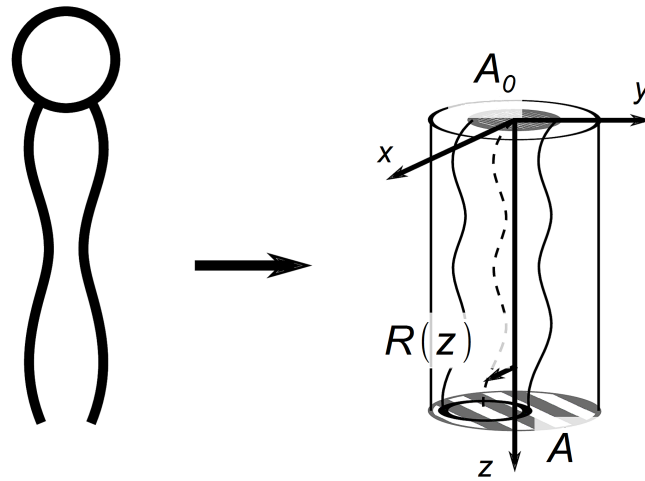

**Figure 1** Hydrocarbon tails of lipid as flexible strings.  $R(z)$  - the deviation of the string from the cylinder axis,  $A_0$  is incompressible area per chain. Because the lipid strings makes the bending fluctuations its real area is greater than incompressible one:  $A=A_0 \cdot a$ , where  $a$  is dimensionless area per lipid chain.

In formula (1) the first term is the kinetic energy of the chain, the second term is the bending energy of the chain, the third term is the potential representing entropic repulsion with the neighboring chains;  $\rho$  is the linear density of the chain.

Energy functional of the chain conformations (1) can be rewritten in the operator form, provided there are certain boundary conditions at the chain ends [1, 2]:

$$E_t = \frac{1}{2} \cdot \int_0^{L_0} [\rho \dot{R}^2(z) + R(z) \hat{H} R(z)] dz, \quad (2)$$

where the conformational energy operator is determined by expression:

$$\hat{H} = K_f \cdot \frac{\partial^4}{\partial z^4} + B \quad (3)$$

We can solve the operator equation  $\hat{H} R_n = E_n \cdot R_n$  and find the eigenfunctions and eigen values of  $\hat{H}$ . Then we expand the chain deviation  $R(z)$  in these eigenfunctions:

$R(z) = \sum_n C_n R_n(z)$ . Using the orthonormality condition  $\int_0^{L_0} R_n(z) R_{n'}(z) dz = \delta_{nn'}$ , we can write the

energy functional in the amplitudes  $\{C_n\}$  representation of the expansion over the eigenfunctions:

$$E_t = \frac{1}{2} \cdot \sum_n [\rho \dot{C}_n^2 + C_n^2 E_n], \quad (4)$$

where  $E_n$  is the n-th eigenvalue:

$$E_n = B + \frac{K_f}{L_0^4} \cdot \left(\frac{\Pi}{4}\right)^4 (4n-1)^4; n \geq 1; E_0 = B \quad (5)$$

of the n-th eigenfunction  $R_n(z)$ :

$$R_n(z) = q_n \cdot \left[ \cos(\lambda_n z) + \frac{\cos(\lambda_n L_0)}{\cosh(\lambda_n L_0)} \cdot \cosh(\lambda_n z) \right]; n \geq 1; R_0(z) = \sqrt{\frac{1}{L_0}} \quad (6)$$

In last formula were used the following notations:  $q_n \approx \sqrt{\frac{2}{L_0}}$  and  $\lambda_{n \geq 1} \cdot L_0 = -\frac{\Pi}{4} + \Pi n$ .

Knowing the energy functional (1) allows one to calculate the partition function consisted in the product of two equal components,  $Z = Z_x Z_y = Z_x^2$ :

$$Z_x = \int \int \exp\left(-\frac{E_t[R_x(z), \dot{R}_x(z)]}{kT}\right) DR_x D\dot{R}_x \quad (7)$$

The partition function in the amplitudes  $\{C_n\}$  representation takes the form:

$$Z_x = \prod_n \int_{-\infty}^{\infty} \exp\left(-\frac{p_n^2}{2\rho k_B T} - \frac{C_n^2 \cdot E_n}{2k_B T}\right) dp_n dC_n = \prod_n \frac{k_B T}{\hbar} \cdot \sqrt{\frac{\rho}{E_n}} \quad (8)$$

Hence, using the free energy formula:

$$F_t = -2k_B T \ln Z_x, \quad (9)$$

where  $F_t$  is the free energy of the tails, and then substituting (8) into (9) one can obtain:

$$F_t = k_B T \sum_n \ln E_n + const, \quad (10)$$

Using formula (10) we find the lateral pressure inside the hydrophobic part of the bilayer  $P_t$ :

$$P_t = -\frac{\partial F_t}{\partial A}. \quad (11)$$

The self-assembly condition (i.e. zero total lateral tension of the self-assembled membrane) is represented in the form:

$$\left(\frac{\partial F_t}{\partial A}\right) + \gamma = 0, \quad (12)$$

where  $\gamma$  is the surface tension at the interface between the polar and hydrophobic regions of the membrane [1]. The physical meaning of this value is the surface tension at the lipid-water interface (situated between hydrophobic tails and hydrophilic heads):  $\gamma = 30 - 100 \text{ dyn/cm}$  for various lipids. So the equilibrium condition (12) simply states that repulsion between chains should be balanced by the surface tension  $\gamma$ .

Lateral pressure is expressed in the following form [1]:

$$P_t = - \int k_B T \cdot \sum_{n=0} \frac{R_n^2(z)}{E_n} \cdot \left( \frac{\partial B}{\partial A} \right)_T dz \equiv \int \Pi_t^{(0)}(z) dz \quad (13)$$

Here the lateral pressure profile distribution  $\Pi_t^{(0)}(z)$  in the flat bilayer is introduced by the formula:

$$\Pi_t^{(0)}(z) = -kT \sum_n \frac{R_n^{(0)2}(z)}{E_n^{(0)}} \frac{\partial B^{(0)}}{\partial A} \quad (14)$$

where the entropic repulsion coefficient in a flat membrane  $B^{(0)}$  and the area per lipid chain  $A$  can be found from self-consistency equation. Below we describe some details of this derivation.

The partial derivative of the free energy  $F$  with respect to  $B$  is:

$$\frac{\partial F}{\partial B} = k_B T \cdot \sum_n \frac{1}{E_n} \quad (15)$$

On the other hand, from the initial expression for the energy functional of the chain (1) the formula for partial derivative is expressed as follows:

$$\frac{\partial F}{\partial B} = k_B T \cdot \frac{\int_0^{L_0} \int R_x^2(z) \exp\left[-\frac{E(R_x(z))}{k_B T}\right] dz D R_x}{\int \exp\left[-\frac{E(R_x(z))}{k_B T}\right] D R_x} = L_0 \cdot \langle R^2 \rangle \quad (16)$$

Here  $\langle R^2 \rangle$  is the average of square deviation. It can be written in the form [1]:

$$\langle R^2 \rangle = \frac{(\sqrt{A} - \sqrt{A_0})^2}{\Pi}, \quad A = a \cdot A_0 \quad (17)$$

where  $A_0$  is incompressible area per lipid chain and  $A$  is the real area occupied by the chain.

Equating the right sides of the Eqs. (15) and (16) one gets the self-consistency equation :

$$k_B T \cdot \sum_n \frac{1}{E_n} = \frac{L_0}{\Pi} \cdot \langle R^2 \rangle \quad (18)$$

One can substitute the expression for the eigen values (5) into last formula (18) and obtain the self-consistency equation in dimensionless form [17]:

$$\frac{1}{b} + \sum_{n=1}^{\infty} \frac{1}{b + \left( \Pi n - \frac{\Pi}{4} \right)^4} - \nu (\sqrt{a} - 1)^2 = 0, \quad (19)$$

This sum might be re-written as an integral  $I = \frac{1}{2i} \oint_{C_1 \cup C_2} \frac{e^{i\pi z} dz}{\sin(\pi z) \left[ b + \left( \pi z - \frac{\pi}{4} \right)^4 \right]}$ . Evaluating

this integral using residue theory one can obtain [18]:

$$\frac{1}{b} + \sum_{n=1}^{\infty} \frac{1}{b + \left( \pi n - \frac{\pi}{4} \right)^4} = \frac{3}{4b} + \frac{1}{2\sqrt{2}b^{3/4}}, \quad (20)$$

where  $\nu$  and  $b$  are dimensionless coefficients:

$$\nu = \frac{K_f \cdot A_0}{\pi k_B T L_0^3}, \quad B = \frac{K_f}{L_0^4} \cdot b \quad (21)$$

So, the self-consistency equation (19) takes the form below:

$$\frac{3}{4b} + \frac{1}{2\sqrt{2}b^{3/4}} = \nu (\sqrt{a} - 1)^2 \quad (22)$$

Solving of equation (19) gives the expression for entropic coefficient:

$$b = \frac{1}{4\nu^{4/3} (\sqrt{a} - 1)^{8/3}} + \frac{1}{\nu (\sqrt{a} - 1)^2} \quad (23)$$

Then, the area per chain  $a$  in the flat monolayer may be found from equilibrium equation [1,2]:  $\frac{\partial F_t}{\partial A} = -\gamma$ . Calculated area per lipid chain and entropic potential coefficient for various lipids are represented in Supplementary table 1.

Finally, we obtain the expressions for derivatives of entropic coefficient consisted in expression for lateral pressure profile (14).

One can differentiate the self-consistency equation (19):  $\left( \frac{3}{4b^2} + \frac{3}{8\sqrt{2}b^{7/4}} \right) \frac{\partial b}{\partial a} + \nu \frac{\sqrt{a} - 1}{\sqrt{a}} = 0$

and find expression for the first derivative of entropic coefficient  $\frac{\partial b}{\partial a}$ :

$$\frac{\partial b}{\partial a} = -\frac{16\nu(\sqrt{a} - 1)b^2}{3\sqrt{a}(4 + \sqrt{2}b^{1/4})} \quad (24)$$

Further, one can re-differentiate obtained equation:

$$\left[ \frac{3}{4b^2} + \frac{3}{8\sqrt{2}b^{7/4}} \right] \frac{\partial^2 b}{\partial a^2} - 2 \left[ \frac{3}{4b^3} + \frac{21}{64\sqrt{2}b^{11/4}} \right] \left( \frac{\partial b}{\partial a} \right)^2 + \nu \frac{1}{2a^{3/2}} = 0$$

and find expression for the second derivative  $\frac{\partial^2 b}{\partial a^2}$ :

$$\frac{\partial^2 b}{\partial a^2} = -\frac{8b^2\nu}{3a^{3/2}(4+\sqrt{2}b^{1/4})} + \frac{64}{9} \frac{\nu^2 b^3 (\sqrt{a}-1)^2 (32+7\sqrt{2}b^{1/4})}{a(4+\sqrt{2}b^{1/4})^3} \quad (25)$$

## Results

### Model of bent bilayer membrane

Here we introduce our description of bent bilayer. We consider the pure bending of the membrane (see fig. 2). We assume that the pivotal surfaces are located in the hydrophobic-hydrophilic interfaces of the bilayer membrane [19, 20, 21]. Conservation of volume per lipid causes top layer to become thinner while the bottom one becomes thicker. Below we use notations  $A_b(z)$  for the area per chain in the inner ('bottom') monolayer, and  $A_t(z)$  for the outer ('top') monolayer, respectively (see fig. 2).

As is well known from differential geometry [20], for two parallel curved surfaces at a distance  $z$ , the area elements are related by the following equation:  $dA' = dA \cdot (1 - zJ + z^2 K)$ , where  $J$  is mean curvature;  $K$  is Gaussian curvature. In what follows we disregard Gaussian curvature contribution for the chosen topology of the membrane and write the area change in the form [22]:

$$dA' = dA \cdot (1 - zJ), \quad (26)$$

where  $J$  is the curvature of the surface  $dA$ .

Using formula (26), one may define the area change via depth coordinate  $z$  for the 'bottom' monolayer in a curved bilayer membrane (the mean curvature of the bottom monolayer is represented by expression:  $J_b = -J(1 + L_b J) < 0$ )

and for the 'top' monolayer ( $J_t = J(1 - L_t J) > 0$ ):

$$\begin{aligned} A(z, J) &= A(1 - zJ + zL_t J^2); 0 \leq z \leq L_t; \textit{top} \\ A(z, J) &= A(1 + zJ + zL_b J^2); 0 \leq z \leq L_b; \textit{bottom} \end{aligned} \quad (27)$$

In eq. (27) the origin of  $z$  is different for 'bottom' and 'top' monolayer (see fig. 2),  $A$  - the area per lipid chain in flat monolayer ( $J=0$ ):  $A = A_0 \cdot a$ , where  $A_0$  is incompressible area per lipid chain and  $a$  is dimensionless area per lipid chain.

Using formula (27) we can calculate the derivatives of the area per lipid chain with respect to curvature  $J$  in each monolayer:



$$\begin{aligned} \frac{\partial A}{\partial J}(J=0) &= -A z; \text{ top} \\ \frac{\partial A}{\partial J}(J=0) &= A z; \text{ bottom} \end{aligned} \quad (28)$$

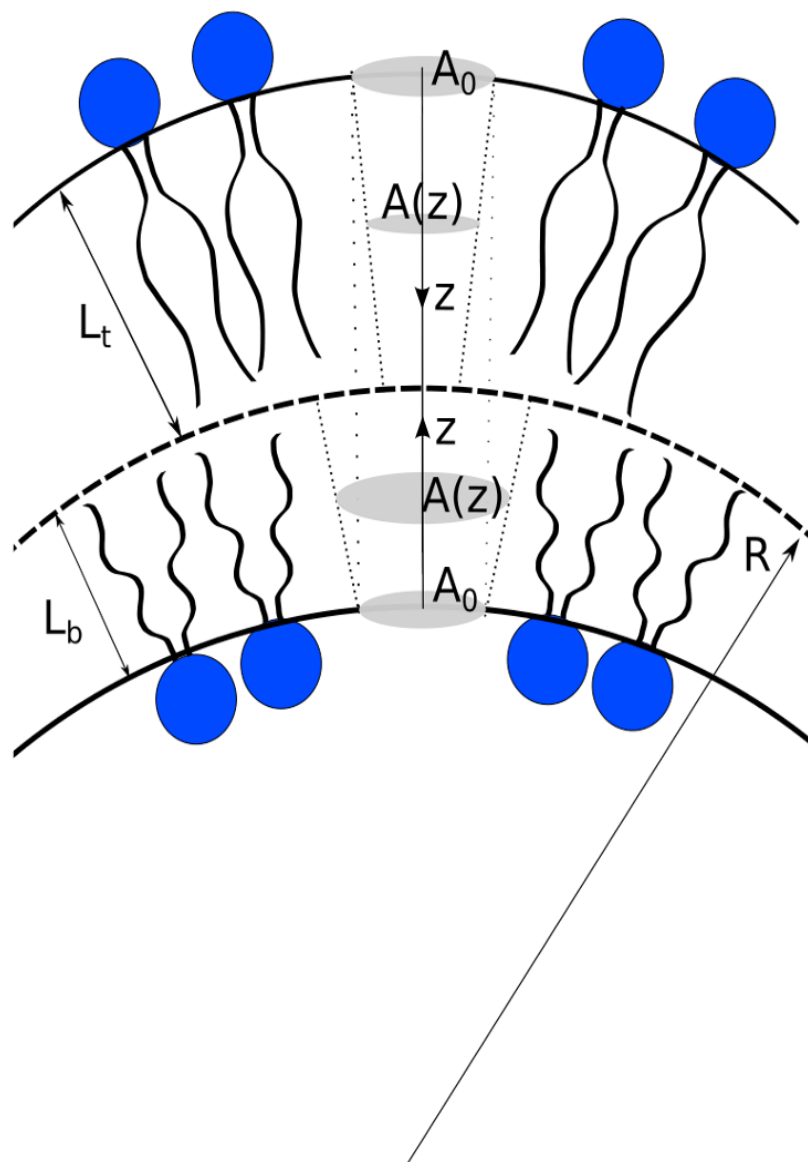

**Figure 2** Membrane bending model.  $L_b$  - the thickness of the inner monolayer,  $L_t$  - the thickness of the outer monolayer;  $|J_b| = \frac{1}{R_b}$  and  $|J_t| = \frac{1}{R_t}$  - the mean curvature of bottom and top cylindrical pivotal surfaces, respectively, where  $R_b = R - L_b$  and  $R_t = R + L_t$  - the curvature radii of these surfaces. For spherical surface the mean curvature for monolayers are given by expressions:  $|J_b| = \frac{2}{R_b}$ ,

$|J_t| = \frac{2}{R_t}$ . Here  $J$  is the curvature of the intermonolayer surface. The curvatures of bottom and top pivotal surfaces differ by sign.

Under bending area per lipid at the headgroup pivotal surfaces of each monolayer is unchanged with respect to flat membrane provided there is a lipids reservoir or intermonolayer slide.

## The change of lateral pressure profile induced by curvature

In this section we re-derive in the present context the formula (14).

Namely, the perturbation theory can be applied to the conformational energy operator  $\hat{H}$  (3) and the first correction to the lateral pressure profile due curvature can be calculated.

In the case of bent membrane the entropic repulsion coefficient  $B$  of the flat bilayer in formula (3) acquires the curvature induced depth-dependent correction  $B^{(1)}(z, J)$ . Thus, the perturbation of 'Hamiltonian' is  $\hat{H}^{(1)}$ :

$$\hat{H}^{(1)} = B^{(1)}(z, J) \quad (29)$$

Further function  $B^{(1)}(z)$  constituting the perturbation operator in (29) can be obtained in the first approximation by the Taylor's expansion of  $B$  in powers of the curvature  $J$ :

$$B = B^{(0)} + \frac{\partial B}{\partial J} \cdot J \quad (30)$$

In this case derivative of the entropic potential  $\frac{\partial B}{\partial J}$  is taken at zero curvature  $J=0$ .

The first correction to entropic potential is represented by the formula:

$$B^{(1)} = \frac{\partial B}{\partial J} \cdot J, \quad (31)$$

where derivative of  $B$  with respect to curvature  $\frac{\partial B}{\partial J}$  equals:

$$\frac{\partial B}{\partial J} = \frac{\partial B^{(0)}}{\partial A} \frac{\partial A}{\partial J} (J=0) \quad (32)$$

We apply perturbation theory  $(\hat{H}^{(0)} + \hat{H}^{(1)})R_n = E_n R_n$  to obtain the first correction  $E_n^{(1)}$  to eigenvalue  $E_n^{(0)}$  [23]:

$$E_n^{(1)} \equiv B_{nn} = \int_0^{L_0} B^{(1)}(z, J) \cdot R_n^{(0)2}(z) dz \quad (33)$$

Then we can re-write the free energy for curved membrane in the operator form

$F^{curv} = kT \sum_n \ln(E_n^{(0)} + E_n^{(1)})$  and differentiating it with respect to area per chain  $A(z)$  we can find

lateral pressure profile in curved membrane  $\Pi_t^{curv}(z, J) = -\frac{\delta F^{curv}}{\delta A(z)}$ :

$$\Pi_t^{curv}(z, J) = -kT \cdot \sum_n \frac{1}{E_n^{(0)} + E_n^{(1)}} \cdot \frac{\delta E_n}{\delta B(z)} \cdot \frac{\partial(B^{(0)} + B^{(1)})}{\partial A} \quad (34)$$

Using formula (33) one can calculate the variational derivative  $\frac{\delta E_n}{\delta B(z)}$  and substituted obtained expression in (34) and then distinguish the lateral pressure profile in flat membrane  $\Pi_t^{(0)}(z)$  (see eq. (14)) and the correction to the lateral pressure profile due curvature  $\Pi_t^{(1)}(z, J)$ :

$$\Pi_t^{(1)}(z, J) = -kT \sum_n \frac{R_n^{(0)2}}{E_n^{(0)}} \cdot \frac{\partial B^{(1)}}{\partial A} + kT \sum_n \frac{R_n^{(0)2}}{E_n^{(0)}} \cdot \frac{E_n^{(1)}}{E_n^{(0)}} \cdot \frac{\partial B^{(0)}}{\partial A} + kT \sum_n \frac{R_n^{(0)2}}{E_n^{(0)}} \cdot \frac{E_n^{(1)}}{E_n^{(0)}} \cdot \frac{\partial B^{(1)}}{\partial A} \quad (35)$$

As one can see from equations (31), (32) and (33) the last term in formula (35) is proportional to the second order curvature  $J^2$  and it may be vanished in the first approximation for the case of small bending. So, the final expression to the correction to lateral pressure due curvature is represented by formula:

$$\Pi_t^{(1)}(z, J) = -kT \sum_n \frac{R_n^{(0)2}(z)}{E_n^{(0)}} \cdot \frac{\partial B^{(1)}}{\partial A} + kT \sum_n \frac{R_n^{(0)2}(z)}{E_n^{(0)}} \cdot \frac{E_n^{(1)}}{E_n^{(0)}} \cdot \frac{\partial B^{(0)}}{\partial A}, \quad (36)$$

where  $E_n^{(1)}$  and  $\frac{\partial B^{(1)}}{\partial A}$  can be re-written as:

$$E_n^{(1)} = J \cdot \frac{\partial B^{(0)}}{\partial A} \cdot \int_0^{L_0} \frac{\partial A}{\partial J} R_n^{(0)2}(z) dz \quad (37)$$

$$\frac{\partial B^{(1)}}{\partial A} = J \cdot \frac{\partial^2 B^{(0)}}{\partial A^2} \cdot \frac{\partial A}{\partial J} \quad (38)$$

Expressions for derivatives of  $B^{(0)}$  with respect to  $A$  may be re-written through

dimensionless ones:  $\frac{\partial B^{(0)}}{\partial A} = \frac{K_f}{L_0^4 A_0} \frac{\partial b^{(0)}}{\partial a}$  and represented in Supplementary table 1. The

corrections to the lateral pressure profile  $\Pi_t^{(1)}(z, J)$  in the inner and the outer monolayers of the bent bilayer can be written in the form:

$$\Pi_{t,bot}^{(1)}(z, J) = -kT \frac{\partial^2 B^{(0)}}{\partial A^2} \cdot A \cdot \sum_n \frac{R_n^{(0)2}(z)}{E_n^{(0)}} \cdot z J + kT \left( \frac{\partial B^{(0)}}{\partial A} \right)^2 \cdot A \sum_n \frac{R_n^{(0)2}(z)}{E_n^{(0)2}} \cdot J \int_0^{L_0} z R_n^{(0)2} dz, \quad (39)$$

where  $A = a \cdot A_0$  - the area per lipid chain in flat bilayer.

In expression (39) variable  $z$  varies in the interval  $z \in [0; L_b]$ , where  $L_b = L_0 - \frac{L_0^2 J}{2}$  is the thickness of the inner ('bottom') monolayer that follows from the volume per lipid conservation (see fig. 2).

$$\Pi_{t,top}^{(1)}(z, J) = kT \frac{\partial^2 B^{(0)}}{\partial A^2} \cdot A \cdot \sum_n \frac{R_n^{(0)2}(z)}{E_n^{(0)}} \cdot z J - kT \left( \frac{\partial B^{(0)}}{\partial A} \right)^2 \cdot A \sum_n \frac{R_n^{(0)2}(z)}{E_n^{(0)2}} \cdot J \int_0^{L_0} z R_n^{(0)2} dz, \quad (40)$$

In expression (40) variable  $z$  varies in the interval:  $z \in [0; L_t]$ , where  $L_t = L_0 + \frac{L_0^2 J}{2}$  is the thickness for the outer ('top') monolayer, derived from conservation condition of the volume per lipid (here  $J$  is curvature of the intermonolayer surface – see fig. 2)

The results (39)-(40) are plotted in fig. 3.

As one can note the bending shifts position of the peak of lateral pressure profile along the  $z$ -axis. This is caused by the fact that the top and bottom monolayers acquire different thicknesses due to the bending (see Fig. 2).

Inside the inner layer  $z \in [0; L_b]$  of the bent bilayer the area per one tail is greater than in the flat membrane (see eq. (27)), therefore, the entropic repulsion is weakened, and, hence, the lateral pressure is lowered (see fig. 3). In the outer layer  $z \in [0; L_t]$  of bilayer inter-tails space is compressed and entropic repulsion between tails, i.e. lateral pressure, raises up.

Obtained from our microscopic model the lateral pressure profile in hydrophobic part of the bilayer (fig. 3) agrees qualitatively well with results of molecular dynamic simulation (see fig.2a in work [24]) and with our previous obtained calculated pressure profile [25].

Also our asymmetrical lateral pressure profile is well consistent with earlier obtained computational calculations by authors [26] obtaining the lateral pressure profile imbalance in the DOPC bilayer with the asymmetric addition of non-bilayer lipids into one of the monolayers. Also authors of this article [26] and other work [6, 27] investigated that asymmetric incorporation of conical lipids into bilayer was shown to activate mechanosensitive channels (particularly, the simplest model system such a mechanosensitive channels of large conductance) in the absence of external surface tension. In next section we'll check analytically this statement.

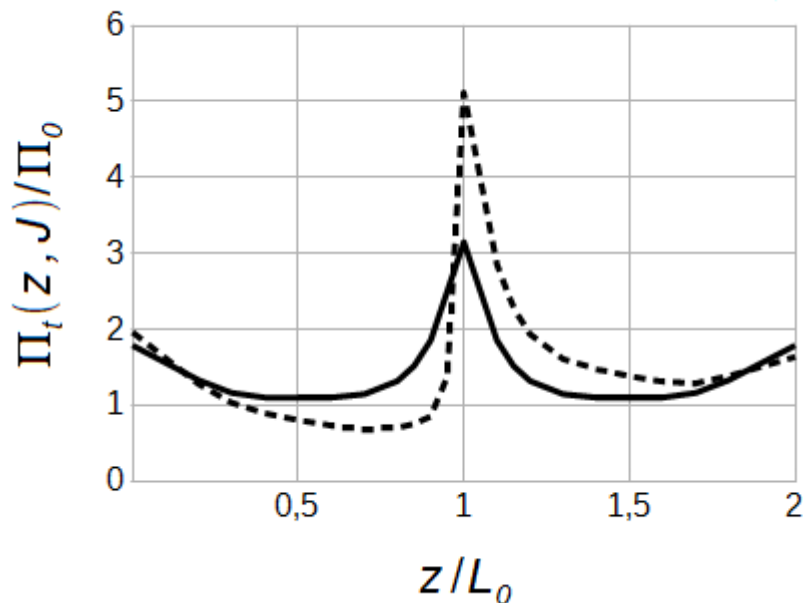

**Figure 3** Lateral pressure profiles in hydrophobic part of DPPC bilayer, normalized with  $\Pi_0 = \gamma/L_0$ . Lateral pressure in the flat membrane (solid line), lateral pressure profile in lipid bilayer with finite curvature  $J = \frac{2}{R}$  (dotted line), where  $R = 20 \text{ nm}$  - the fixed curvature radius. Here  $\gamma = 50 \text{ dyn/cm}$  is inter-facial surface tension,  $L_0 = 1,5 \text{ nm}$  - the monolayer thickness.

## Mechanosensitive channel gating

The conformation shape of MscL was found to change between cylindrical (closed) and conical (open) shapes [28]. Other authors [29] assumed that conical shape of channel corresponds to its intermediate state, but hour-glass shape corresponds to its open state (see fig. 4). To estimate the effect of pressure profile on membrane proteins, we followed the approach introduced in articles [4], [13], [30] where was shown that lateral pressure profile affects the functioning of the proteins embedded in lipid membrane and was calculated numerically the work on MscL opening:

$$\Delta E = \int_0^{2L_0} P(z) \Delta A(z) dz, \quad (41)$$

where  $P(z)$  - lateral pressure in hydrophobic part of the bilayer,  $\Delta A(z)$  - the changing of the channel area during its opening process. The mechanosensitive channel opening of pore was experimentally determined [12] to have a diameter of  $d = 2,5 \text{ nm}$ .

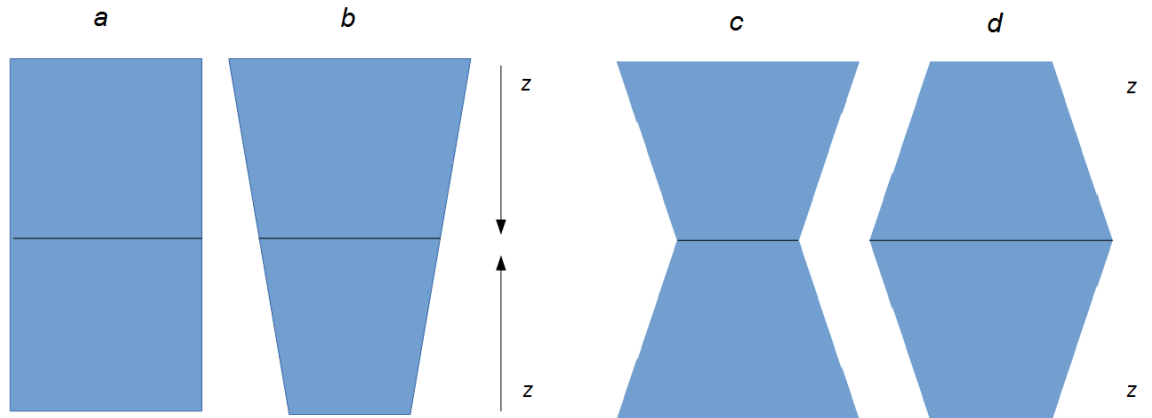

**Figure 4** The modeling of MSC shape. *a*: the cylindrical channel; *b*: conical shape of the channel; *c*, *d*: the hour-glass shape of the channel; the cross-sectional area in the middle of the mechanosensitive channel doesn't change.

The authors of work [5] using the molecular dynamic methods have shown that lipid bilayer bending is the cause why MSCs can be opened. Our aim in this section is to test analytically this hypothesis and continue our previously started calculation [31] and obtain the expression for energy difference between two various states of the mechanosensitive channel.

At the beginning we define the area difference between states of MSC using experimental data [12]. The cross-sectional area of channel  $A(z)$  is decomposed into two components: a constant mid-plane area  $A_m$  and  $z$ -dependent shape variation  $\Delta A(z)$  around  $A_m$ , and for conical shape of the channel we obtain asymmetric area changing with respect to middle of the bilayer, but for hour-glass one – symmetrical area changing [29].

Then for the conical shape of the mechanosensitive channel (see fig. 4b) we obtain the next area changing:

$$\begin{aligned}\Delta A_{A \rightarrow B}(z) &= \alpha A_m (z - L_0); \text{ bot} \\ \Delta A_{A \rightarrow B}(z) &= -\alpha A_m (z - L_0); \text{ top}\end{aligned}\quad (42)$$

also for hour-glass conformation of the channel (see fig. 4c):

$$\begin{aligned}\Delta A_{A \rightarrow C}(z) &= -\alpha A_m (z - L_0); \text{ bot} \\ \Delta A_{A \rightarrow C}(z) &= -\alpha A_m (z - L_0); \text{ top}\end{aligned}\quad (43)$$

and for hour-glass conformation of the channel (see fig. 4d), respectively:

$$\begin{aligned}\Delta A_{A \rightarrow D}(z) &= \alpha A_m (z - L_0); \text{ bot} \\ \Delta A_{A \rightarrow D}(z) &= \alpha A_m (z - L_0); \text{ top}\end{aligned}\quad (44)$$

In eq. (42)-(44) zero of axis  $z$  is in the pivotal surfaces (see fig. 1, 2),  $A_m = \frac{\pi d^2}{4}$  is changing

of MSC area in the middle of bilayer and the slope is [12]:  $\alpha = \frac{3}{10 L_0}$ , where  $L_0$  is the monolayer thickness.

At last, we can write the energy difference between two various states of channel in the following form [32]:

$$\Delta W = W_{final} - W_{initial}, \quad (45)$$

where  $W_{final}$  and  $W_{initial}$  - the energy of final and initial state of lipid environment and the channel.

The comparison of obtained results for the energy difference between two states of mechanosensitive channel in conical and hour-glass models are represented in table 1. Decreased opening barrier due to the lateral pressure imbalance and the spontaneous bending are shown separately in Supplementary figures 1, 2. The figure S1 shows that when MSC changed its shape from cylindrical to conical one, the bending energy of bilayer decreases by  $5 k_B T$  average. During this process the stretching energy is increasing by amount about  $10 k_B T$  (see tables 1, 2). These estimate agrees qualitatively well with results of molecular dynamics simulations presented in [4, 32, 33] where values of the energy difference between open and closed MSC states is about  $0-10 k_B T$ . The figure S2 shows that when the channel has changed its shape from cylindrical to hour-glass one, the spontaneous bending energy decreases by amount  $8-15 k_B T$  while the membrane hydrophobic energy increases by amount about  $15-30 k_B T$  (see table 2).

Analytical calculation of the bending modulus and spontaneous bending moment for the case of small bending are represented in Supplementary text 1. The obtained results are good agreement with previously obtained result for spontaneous bending moment  $\kappa_m \cdot J_s = (-151 \pm 6) \times 10^{-13} J/m$  [24] and bending modulus of lipid monolayer [24], [34] (see table 3).

The analysis of the relation between bending and stretching moduli of the bilayer is represented in table 4. Usually experimental value for bending modulus for different lipid bilayers vary between  $(0,1-6) \times 10^{-19} J$  [35-37]. The relation between bilayer bending modulus and area stretching modulus of the bilayer obtained from our calculation is expressed by the formula:

$\kappa_b \approx \frac{1}{12} \cdot K_{Ab} L_b^2$ , where  $L_b = 2L_0$  - the bilayer thickness and  $\kappa_b = 2\kappa_m$  the bending modulus for the bilayer. This condition is considered as correct one for symmetrical monolayers [37, 38].

| Process details                                                                                                                                                                                         | $\Delta W_{A \rightarrow B}$                                   | $\Delta W_{A \rightarrow C}$                             | $\Delta W_{A \rightarrow D}$                             |
|---------------------------------------------------------------------------------------------------------------------------------------------------------------------------------------------------------|----------------------------------------------------------------|----------------------------------------------------------|----------------------------------------------------------|
| $\Pi_i = \Pi_i + \Pi_i^{(1)}$ $A_i = A_i \equiv A_m + \Delta A(z)$<br>$\Delta W = \int_0^{2L_0} \Pi_i^{(1)}(z, J) \Delta A(z) dz$                                                                       | $-2\alpha A_m \kappa_m J +$<br>$\Delta A_{max} K_{Ab}^- L_0 J$ | 0                                                        | 0                                                        |
| $\Pi_i = \Pi_i \equiv \Pi_i^{(0)}$<br>$A_i = A_i + \Delta A(z) \equiv A_m + \Delta A(z)$<br>$\Delta W = \int_0^{2L_0} \Pi_i^{(0)}(z) \Delta A(z) dz$                                                    | 0                                                              | $2\alpha A_m \kappa_m J_s +$<br>$2\Delta A_{max} \gamma$ | $-2\alpha A_m \kappa_m J_s$<br>$-2\Delta A_{max} \gamma$ |
| $\Pi_i = \Pi_i + \Pi_i^{(1)}$<br>$A_i = A_i + \Delta A(z) \equiv A_m + \Delta A(z)$<br>$\Delta W = \int_0^{2L_0} \Pi_i^{(0)}(z) \Delta A(z) dz +$<br>$+ \int_0^{2L_0} \Pi_i^{(1)}(z, J) \Delta A(z) dz$ | $-2\alpha A_m \kappa_m J +$<br>$\Delta A_{max} K_{Ab}^- L_0 J$ | $2\alpha A_m \kappa_m J_s +$<br>$2\Delta A_{max} \gamma$ | $-2\alpha A_m \kappa_m J_s$<br>$-2\Delta A_{max} \gamma$ |

**Table 1** The energy difference between two states of the mechanosensitive channel in conical and hour-glass models. Here  $\kappa_m$  - the bending modulus of the monolayer and  $\kappa_m J_s$  - the first spontaneous bending moment (see Supplementary text 1),  $L_0$  - the monolayer thickness,  $J$  - the curvature of intermonolayer surface (see fig. 2),  $\gamma$  - the inter-facial surface tension.  $A_m = 4.9 \text{ nm}^2$  is the area of MSC in the middle of bilayer. The last line in this table shows the mixed process in which at first step the spontaneous curvature was induced in one of the monolayers of bilayer and then this bilayer was bent in addition. Index  $i$  means the initial state, and  $f$  means the final state of the mechanosensitive channel and its environment (lipid bilayer). The channel area changing at the inter-facial region is  $\Delta A_{max} = \alpha L_0 A_m \equiv \frac{3}{10} A_m$  (see eq. (42)-(44)).  $K_{Ab}^- = 2 \frac{kT}{A_0} a \left[ \frac{\partial^2 b}{\partial a^2} \sum_{n=0}^{\infty} \frac{I_1(n)}{b + c_n^4} - \left( \frac{\partial b}{\partial a} \right)^2 \sum_{n=0}^{\infty} \frac{I_1(n)}{(b + c_n^4)^2} \right] = r \cdot K_{Ab} \approx \text{Const} \cdot K_{Ab}$  - re-normalized area stretching modulus of the bilayer, where expression for the integral  $I_1(n)$  one can find in Supplementary text 1.

| Contribution into energy difference | $\Delta W_{A \rightarrow B}, k_B T$ |       |       | $\Delta W_{A \rightarrow C}, k_B T$ |        |        | $\Delta W_{B \rightarrow C}, k_B T$ |        |        |
|-------------------------------------|-------------------------------------|-------|-------|-------------------------------------|--------|--------|-------------------------------------|--------|--------|
|                                     | 30                                  | 40    | 50    | 30                                  | 40     | 50     | 30                                  | 40     | 50     |
| $\gamma, \text{ mN/m}$              | 30                                  | 40    | 50    | 30                                  | 40     | 50     | 30                                  | 40     | 50     |
| $ 2\alpha A_m \kappa_m J_s $        | 0                                   | 0     | 0     | -8,15                               | -10,85 | -13,56 | -8,15                               | -10,85 | -13,56 |
| $ 2\Delta A_{max} \gamma $          | 0                                   | 0     | 0     | 21,33                               | 28,44  | 35,55  | 21,33                               | 28,44  | 35,55  |
| $ 2\alpha A_m \kappa_m J $          | -2,08                               | -3,02 | -4,04 | 0                                   | 0      | 0      | 2,08                                | 3,02   | 4,04   |
| $ \Delta A_{max} K_{Ab}^- L_0 J $   | 2,42                                | 3,52  | 4,72  | 0                                   | 0      | 0      | -2,42                               | -3,52  | -4,72  |
| $\Delta W_{\Sigma}$                 | 0,34                                | 0,5   | 0,68  | 13,18                               | 17,59  | 21,99  | 12,84                               | 17,09  | 21,31  |

**Table 2** The calculations of the energy difference between two conformations of MSC in DPPC bilayer environment. ( $A_0 = 0,2 \text{ nm}^2$  is an



incompressible area per lipid chain,  $T_0=300K$  is temperature,  $L_0=1,5nm$  is the monolayer thickness). The result for hour-glass model, fig. 4d is different sign in comparison with hour-glass, fig. 4c (see table 1). For calculation the first bending moment of the lateral pressure was taken the curvature radius  $R=20nm$  and curvature for spherical surface  $J=\frac{2}{R}$ . Here  $\gamma$  is the inter-facial surface tension. As one can note that transitions between channel shapes are characterized by relation between energy differences:  $\Delta W_{A \rightarrow B \rightarrow C} = \Delta W_{A \rightarrow B} + \Delta W_{B \rightarrow C} \equiv \Delta W_{A \rightarrow C}$ .

| Lipid       | $\gamma, mN/m$ | $\kappa_m \times 10^{-20} J$ | $\kappa_m J_s \times 10^{-12} J/m$ |
|-------------|----------------|------------------------------|------------------------------------|
| DDPC (10:0) | 30             | 1,5743                       | -10,5144                           |
|             | 40             | 2,0631                       | -12,8678                           |
|             | 50             | 3,0956                       | -17,2432                           |
| DLPC (12:0) | 30             | 2,3397                       | -12,7126                           |
|             | 40             | 3,423                        | -16,8399                           |
|             | 50             | 4,6281                       | -20,9930                           |
| DMPC (14:0) | 30             | 3,2790                       | -14,9388                           |
|             | 40             | 4,7141                       | -19,6062                           |
|             | 50             | 6,4492                       | -24,7940                           |
| DPPC (16:0) | 30             | 4,383                        | -17,1893                           |
|             | 40             | 6,376                        | -22,8856                           |
|             | 50             | 8,5235                       | -28,5995                           |

**Table 3** The spontaneous bending moment  $\kappa_m J_s$  and the bending modulus for the lipid monolayer  $\kappa_m$  calculated analytically within the microscopic model of flexible strings. The input parameters of the lipid chain are:  $A_0=0,2nm^2$  - incompressible area,  $T_0=300K$  - the temperature,  $\gamma$  - the surface tension at the interface between the polar and hydrophobic regions of the membrane. Here  $L_0=0,9nm$  - the monolayer thickness of DDPC(10:0) lipids,  $L_0=1,1nm$  - the monolayer thickness of DLPC(12:0) lipids and so on.

Finally we can point out that our analytical calculation allows estimate quantitatively how changes in the lateral pressure of the bilayer influences on MSC gating mechanism. Altering in pressure profile produces the changing in the locking energy barrier of MSC

$A_m \int_0^{2L_0} \Pi_r^{(0)}(z) dz = 2\gamma A_m$  (see eq. (11)-(12)). And of course, if changes in lipid composition induces spontaneous curvature, then these changes would be produce a significant conformational energy change.

| Lipid       | $\gamma=30mN/m$              |            | $\gamma=40mN/m$              |            | $\gamma=50mN/m$              |            |
|-------------|------------------------------|------------|------------------------------|------------|------------------------------|------------|
|             | $\kappa_b \times 10^{-20} J$ | $K_A, N/m$ | $\kappa_b \times 10^{-20} J$ | $K_A, N/m$ | $\kappa_b \times 10^{-20} J$ | $K_A, N/m$ |
| DDPC (10:0) | 3,1485                       | 0,116      | 4,1263                       | 0,157      | 6,1912                       | 0,2319     |
| DLPC (12:0) | 4,6795                       | 0,117      | 6,8459                       | 0,173      | 9,2562                       | 0,2343     |
| DMPC (14:0) | 6,5581                       | 0,119      | 9,4281                       | 0,172      | 12,898                       | 0,2344     |

|             |       |        |        |       |        |        |
|-------------|-------|--------|--------|-------|--------|--------|
| DPPC (16:0) | 8,766 | 0,1205 | 12,752 | 0,175 | 17,047 | 0,2326 |
|-------------|-------|--------|--------|-------|--------|--------|

**Table 4** The calculation of the bending modulus for various bilayer and its comparison with stretching modulus in the flexible strings

model.  $\kappa_b$  - the bending modulus of the bilayer,  $\gamma$  - the inter-facial surface tension,  $K_{Ab}=2A\frac{\partial^2 F_t}{\partial A^2}$  - the stretching modulus of the

bilayer. Expression for stretching modulus in flexible strings models is:  $K_{Ab}=2a\frac{kT}{A_0}\left(\frac{\partial^2 b}{\partial a^2}\sum_{n=0}^{\infty}\frac{1}{b+c_n^4}-\left(\frac{\partial b}{\partial a}\right)^2\sum_{n=0}^{\infty}\frac{1}{(b+c_n^4)^2}\right)$ . Here

$L_0=0,9nm$  - the monolayer thickness of DDPC(10:0) lipids,  $L_0=1,1nm$  - the monolayer thickness of DLPC(12:0) lipids and so on.

Also, one can note that the great inter-facial tension  $\gamma$  corresponds to a greater change in the energy barrier because the bending modulus  $\kappa_m$  and the entropic potential  $b$  grow up with increasing  $\gamma$ . The energy difference for various lipids is represented in Supplementary table 2. As one can see from table S2, MSCs have been shown to be sensitive to inter-facial surface tension and spontaneous bending moment values. These results are well consistent with numerical calculations

of previous study [4, 32]. The table S2 shows that for fixed slope of the channel  $\alpha=\frac{3}{10L_0}$  we

obtain that the absolute value of work associated with embedding of MSC in its hour-glass configuration into the flat membrane does not depend on the monolayer thickness and depends majorly on the re-normalized inter-facial surface tension  $\Delta W_{A\rightarrow C}\approx\beta\Delta A_{max}\cdot\gamma$ , where  $\beta=1,235\pm 0,005$  - the renormalization constant. This is caused by the fact that spontaneous bending energy  $|2\alpha A_m\kappa_m J_s|$  (see eq. (10), (12), (S8)) lowers/increases the hydrophobic energy  $|2\Delta A_{max}\gamma|$  to the permanent value. This result is well consistent with previous calculation [32].

Of course, one may conclude that bending of membrane associated with simple cylinder-cone-like shape channel transition doesn't produce a great changing in energy difference (see tables 2, S2). Moreover the embedding of MSC in the bent membrane consisting of lipids with short hydrocarbon chains corresponds probably to the intermediate state of the channel, but embedding in long-tails lipid environment corresponds most likely to the closed state of the channel (table S2). This is

caused by the fact that for the channel a probability of being open  $P_0=\frac{1}{1+\exp(\Delta W/kT)}$  is

reducing with increasing the energy difference ( $\Delta W$  is the energy difference between open and closed states of the channel [11, 32, 39]). At contrast the decreasing of the energy barrier corresponds to the open state of MSC (the negative values of the energy difference corresponds to the opening of the mid-plane pore in the channel).

## Author contributions

A.A.D. did the analytical derivation of all thermodynamic characteristics reported in this article and wrote initial version of the paper. S.I.M. supervised through out the research.

## References

1. S.I. Mukhin, S.V. Baoukina, Analytical derivation of thermodynamic characteristics of lipid bilayer from a flexible string model, *Phys.Rev. E*, **71**, 061918 (2005).
2. S.I. Mukhin, B.B. Kheyfets, Analytical approach to thermodynamics of bolalipid membranes. *Phys Rev E*, **82**, 051901 (2010).
3. W. Helfrich *et.al.*, Physics of Defects, *North-Holland Publishing Company, Amsterdam*, 716 (1981)
4. J. Gullingsrud and K. Schulten, *Biophys. J.*, **86**, 3496 (2004)
5. Grisca R. Meyer et al. , *Biophys. J.* **91**, 1630 (2006)
6. E. Perozo and D. C. Ress, Structure and mechanism in prokaryotic mechanosensitive channels, *Curr. Opin. Struc. Biol.*,**13**, 432 (2003)
7. A. G. Lee, *Biochim. Biophys. Acta – Biomembranes*, **1666**, 62 (2004)
8. M. F. Brown, *Chem. Phys. Lipids*, **73**, 159 (1994)
9. E. Perozo, A. Kloda, D. M. Cortes and B. Martinac *et.al.*, Physical principles underlying the transduction of bilayer deformation forces during mechanosensitive channel gating, *Nat. Struct. Biol.*, **9**, 696 (2002b)
10. Hamill O. P. and McBride D. W. Jr., *Proc. Natl. Acad. Sci. USA*, **89**, 7462 (1992)
11. Sergei Sukharev and Frederick Sachs, Molecular force transduction by ion channels – diversity and unifying principles, *Journal of Cell Science*, **125**, 3075 (2012)
12. E. Perozo, B. Martinac *et.al.*, Open channel structure of MscL and the gating mechanism of mechanosensitive Channels, *Nature*, **418**, 942 (2002a)

13. R. S. Cantor, The influence of membrane lateral pressure on simple geometric models of protein conformational equilibria, *Chem. Phys. Lipids*, **101**, 45 (1999)
14. Irene Iscla and Paul Blount, Sensing and responding to membrane tension: the bacterial MscL channel as a model system, *Biophys. J.*, **103**, 169 (2012)
15. P. Moe and P. Blount, Assessment of potential stimuli for mechano-dependent gating of MscL: effects of pressure, tension, and lipid headgroups. *Biochemistry*, **44**, 11239 (2005)
16. R. H. Templer et.al., *Faraday Discuss.* **111**, 41 (1999)
17. Kheifets B.B. PhD thesis "The microscopic theory of the structural and phase transformations in smectic liquid crystals", UDC 577.352, Moscow (2014)
18. Cronin J.A., Greenberg D.F., Telegdi V.L. University of Chicago graduate problems in physics, with solutions. Chicago: University of Chicago Press (1979)
19. W. Helfrich, Elastic properties of lipid bilayers: theory and possible experiments, *Naturforsch C*, **28** (11), 693-703 (1973).
20. Samuel A. Safran, Statistical Thermodynamics of Surfaces, Interfaces and Membranes, Addison-Wesley, Reading, Massachusetts (1994).
21. M.M. Kozlov, M. Winterhalter, Elastic moduli and the neutral surface of strongly bent cylindrical monolayers. *Biol. Membr.* **10**, 71 (1993).
22. Hamm M., Kozlov M. M. Elastic energy of tilt and bending of fluid membranes. *Eur. Phys. J. E.*, **3**, 323 (2000)
23. JJI 3 том
24. O.H. Samuli Ollila *et.al.*, 3D Pressure field in lipid membranes and membrane-protein complexes, *PRL*, **102**, 078101 (2009).
25. A. Drozdova, S. Mukhin, Lateral Pressure Profile in a Lipid Membrane with Curvature: Analytical Expression, *Biophys. J.*, **102**, 503A (2012)
26. Jejoong Yoo and Qiang Cui, Curvature generation and pressure profile modulation in membrane by lysolipids: insights from coarse-grained simulations, *Biophys. J.*, **97**, 2267 (2009)
27. P. Blount, Y. Li, *et. al.*, Mechanosensitive channels gated by membrane tension: bacteria and

- beyond. *In mechanosensitive ion channels*. Springer Press, New York, **71**, 101 (2008)
28. S. Sukharev, S.R. Durell, H. R. Guy, Structural models of the MscL gating mechanism, *Biophys. J.*, **81**, 917 (2001)
29. D. Marsh, Protein modulation of lipids, and vice-versa, in membranes, *BBA*, **1778**, 1545 (2008)
30. R. S. Cantor, *Biophys. J.*, **82**, 2520 (2002)
31. A. Drozdova, S. Mukhin Opening Barrier Renormalization by Membrane Local Curvature Fluctuations around the Mechanosensitive Channel: Analytical Expression, *Biophys. J.*, **104**, 244A, (2013)
32. O. H. Samuli Ollila, Martti Louhivuori, Siewert J. Marrink and Ilpo Vattulainen, Protein shape change has a major effect on the gating energy of a mechanosensitive channel, *Biophys. J.*, **100**, 1651 (2011).
33. S. I. Sukharev, W. J. Sigurdson, C. Kung and F. Sachs, *J. Gen. Physiol.*, **113**, 525 (1999).
34. D. Marsh, Lateral pressure profile, spontaneous curvature frustration, and the incorporation and conformation of proteins in membranes, *Biophys. J.*, **93**, 3884 (2007)
35. Lee C.H., Lin W.C., Wang J. All-optical measurements of the bending rigidity of lipid-vesicle membranes across structural phase transitions. *Phys Rev E*, **64**, 020901 (2001)
36. Seto H., Yamada N. L. , Nagao M., Hishida M., Takeda T. Bending modulus of lipid bilayers in a liquid-crystalline phase including an anomalous swelling regime estimated by neutron spin echo experiments. *Eur Phys J E Soft Matter*, **26**, 217 (2008)
37. D. Marsh, Elastic curvature constants of lipid monolayers and bilayers, *Chem. Phys. Lipids*, **144**, 146 (2006)
38. M. Deserno, Fluid lipid membrane – a primer
39. O. P. Hamill and B. Martinac. Molecular basic of mechanotransduction in living cells. *Physiol. Rev.* **81**, 685-740 (2001)

## Supplementary figure 1

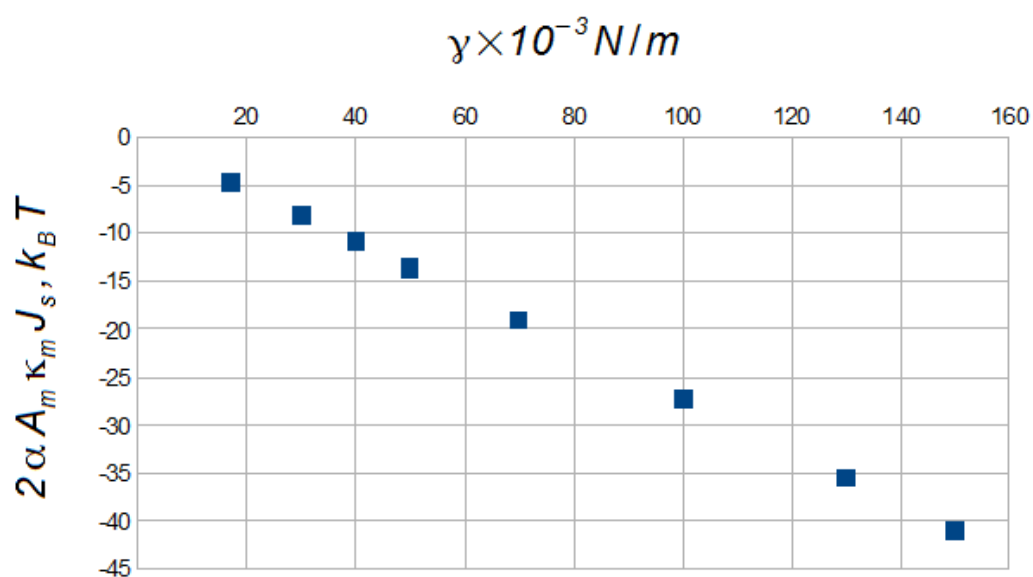

**Figure S1** Decreasing opening barrier due to the spontaneous bending of the lipid membrane, at temperature  $T=300K$ . Here  $\gamma$  - the surface tension between polar and hydrophobic regions and  $\kappa_m J_s$  - the first spontaneous bending moment of the lateral pressure

(see Supplementary text 1),  $\alpha = \frac{3}{10L_0}$  - the slope of MSC,  $L_0$  - the monolayer thickness,  $A_m$  - the area of the channel in the middle of bilayer.

## Supplementary figure 2

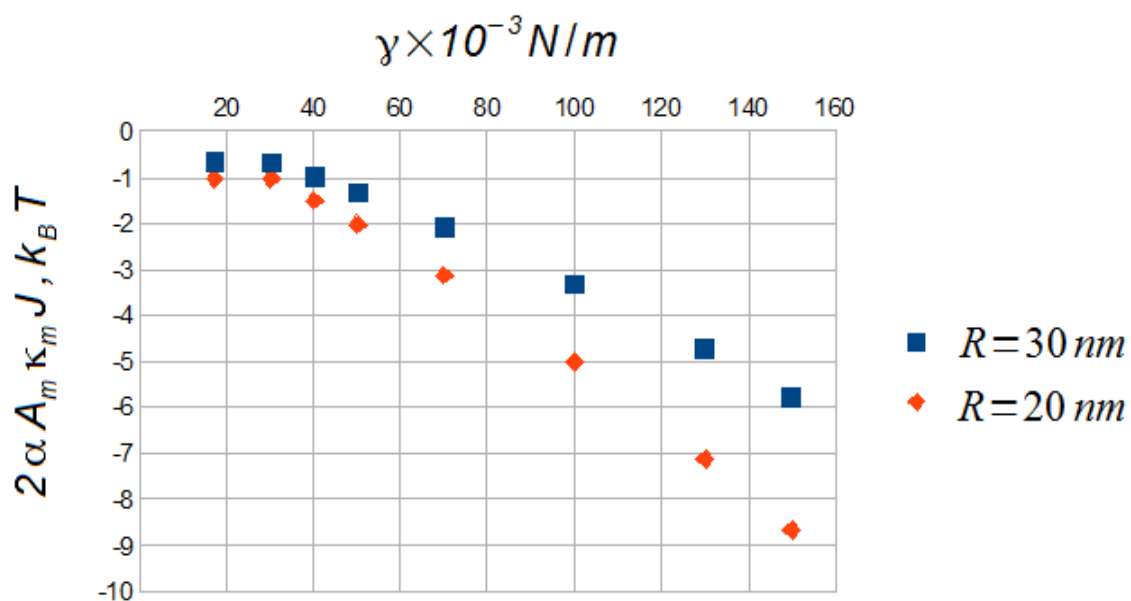

**Figure S2** The reduce of the energy difference between two conformational states of MSC embedded in a bent DPPC bilayer. Here  $\gamma$  - the surface tension between polar and hydrophobic regions and  $R$  - curvature radii,  $\kappa_m J$  - the first bending moment of the lateral pressure (see Supplementary text 1). Here was used the curvature for cylindrical surface  $J = \frac{1}{R}$  (see fig. 2).

## Supplementary table 1

| Lipid parameter                     | $\gamma, mN/m$ | DDPC (10:0) | DLPC (12:0) | DMPC (14:0) | DPPC (16:0) | DSPC (18:0) | DAPC (20:0) | DBPC (22:0) |
|-------------------------------------|----------------|-------------|-------------|-------------|-------------|-------------|-------------|-------------|
| a                                   | 30             | 3,436       | 3,544       | 3,653       | 3,76        | 3,864       | 3,963       | 4,057       |
|                                     | 40             | 3,055       | 3,071       | 3,189       | 3,265       | 3,355       | 3,439       | 3,518       |
|                                     | 50             | 2,678       | 2,774       | 2,864       | 2,949       | 3,027       | 3,1         | 3,168       |
| b                                   | 30             | 101,378     | 149,766     | 205,642     | 268,591     | 338,286     | 414,896     | 498,420     |
|                                     | 40             | 137,974     | 217,865     | 291,904     | 385,138     | 483,27      | 591,465     | 709,560     |
|                                     | 50             | 201,427     | 291,234     | 394,498     | 510,435     | 640,058     | 782,722     | 938,844     |
| $\frac{\partial b}{\partial a}$     | 30             | -77,547     | -107,912    | -141,283    | -177,231    | -215,328    | -255,640    | -298,035    |
|                                     | 40             | -126,525    | -197,833    | -250,418    | -320,315    | -387,188    | -458,015    | -532,370    |
|                                     | 50             | -231,379    | -316,262    | -408,578    | -506,528    | -611,324    | -721,582    | -837,720    |
| $\frac{\partial^2 b}{\partial a^2}$ | 30             | 94,555      | 125,964     | 159,104     | 193,075     | 227,125     | 261,354     | 295,625     |
|                                     | 40             | 185,44      | 291,313     | 351,076     | 436,555     | 508,486     | 580,678     | 652,765     |
|                                     | 50             | 425,664     | 555,477     | 686,855     | 815,909     | 946,176     | 1075,656    | 1206,223    |

**Table S1** The parameters of the lipid chain calculated within the flexible string model at temperature  $T_0=300K$ .  $a$  - area per lipid chain,  $b$  - the entropic coefficient,  $\frac{\partial b}{\partial a}$  - the first derivative of the entropic coefficient,  $\frac{\partial^2 b}{\partial a^2}$  - the second derivative of the entropic coefficient. The fixed parameters for each lipid are:  $A_0=0,2nm^2$  - the incompressible area per chain,  $\nu=\frac{A_0 K_f}{\pi k_B T_0 L_0^3}$  - dimensionless parameter and  $K_f=k_B T_0 L_0/3$  - the bending rigidity of the lipid chain. We vary  $L_0$  - the monolayer thickness and  $\gamma$  - the inter-facial surface tension. Here  $L_0=0,9nm$  - the monolayer thickness of DDPC(10:0) lipids,  $L_0=1,1nm$  - the monolayer thickness of DLPC(12:0) lipids and so on.



## Supplementary table 2

| $\Delta W, k_B T$            | $\gamma, mN/m$ | Lipid       |             |             |             |             |             |             |
|------------------------------|----------------|-------------|-------------|-------------|-------------|-------------|-------------|-------------|
|                              |                | DDPC (10:0) | DLPC (12:0) | DMPC (14:0) | DPPE (16:0) | DSPE (18:0) | DAPC (20:0) | DBPC (22:0) |
| $\Delta W_{A \rightarrow B}$ | 30             | 0,17        | 0,22        | 0,27        | 0,34        | 0,4         | 0,46        | 0,52        |
|                              | 40             | 0,22        | 0,32        | 0,41        | 0,5         | 0,59        | 0,67        | 0,75        |
|                              | 50             | 0,34        | 0,45        | 0,57        | 0,68        | 0,78        | 0,88        | 0,98        |
| $\Delta W_{A \rightarrow C}$ | 30             | 13,02       | 13,11       | 13,16       | 13,18       | 13,2        | 13,2        | 13,2        |
|                              | 40             | 18,09       | 17,56       | 17,72       | 17,59       | 17,6        | 17,59       | 17,58       |
|                              | 50             | 21,93       | 21,98       | 21,99       | 22          | 21,98       | 21,97       | 21,95       |
| $\Delta W_{B \rightarrow C}$ | 30             | 12,86       | 12,9        | 12,89       | 12,85       | 12,8        | 12,74       | 12,67       |
|                              | 40             | 17,87       | 17,23       | 17,31       | 17,1        | 17,01       | 16,92       | 16,84       |
|                              | 50             | 21,59       | 21,53       | 21,42       | 21,32       | 21,2        | 21,09       | 20,98       |
| $\Delta W_{B \rightarrow D}$ | 30             | -13,19      | -13,33      | -13,43      | -13,52      | -13,6       | -13,66      | -13,72      |
|                              | 40             | -18,32      | -17,88      | -18,12      | -18,09      | -18,18      | -18,26      | -18,33      |
|                              | 50             | -22,26      | -22,43      | -22,56      | -22,67      | -22,76      | -22,85      | -22,93      |

**Table S2** The calculated energy difference between two conformational shape of the mechanosensitive channel for different transition and various lipids environment. Here  $\Delta W_{A \rightarrow B}$  - the energy difference for channel transition from cylindrical shape *A* to conical shape *B* and other energy differences may be defined similarly (see fig. 4) and  $\gamma$  - the inter-facial surface tension. One can note that transitions between channel shapes are characterized by relations:  $\Delta W_{A \rightarrow B \rightarrow C} = \Delta W_{A \rightarrow B} + \Delta W_{B \rightarrow C} \equiv \Delta W_{A \rightarrow C}$ ,  $\Delta W_{A \rightarrow D} = -\Delta W_{A \rightarrow C}$ ,  $\Delta W_{A \rightarrow B \rightarrow D} = \Delta W_{A \rightarrow B} + \Delta W_{B \rightarrow D} = -\Delta W_{A \rightarrow B \rightarrow C} \equiv -\Delta W_{A \rightarrow C}$  (see table 1). For the calculation the first bending moment was taken the curvature radius  $R=20\text{ nm}$  and curvature for spherical surface  $J=\frac{2}{R}$ . Here  $L_0=0,9\text{ nm}$  - the monolayer thickness of DDPC(10:0) lipids,  $L_0=1,1\text{ nm}$  - the monolayer thickness of DLPC(12:0) lipids and so on.

## Supplementary text 1

The bending modulus are related to the first moment of the lateral pressure profile in bent monolayer [3, 34]:

$$M_1 = \kappa_m \cdot J = - \int_0^{L_0} \Pi_t^{(1)}(z, J)(z - z') dz; \quad \kappa_m = - \int_0^{L_0} \frac{\partial \Pi_t^{(1)}(z, J)}{\partial J} (z - z') dz, \quad (\text{S1})$$

where  $L_0$  is the monolayer thickness and  $z'$  indicates the pivotal surface position.

The so named first spontaneous bending moment is given in the following form [34]:

$$M_{1s} = \kappa_m J_s = - \int_0^{L_0} (z - z') \Pi_t^{(0)}(z) dz \quad (\text{S2})$$

At the beginning we consider one monolayer of the lipid membrane, for example the 'bottom' (inner) monolayer ( $z'=0$ ), and calculate analytically the first lateral pressure moment and bending modulus (S1). Substituting formula for the correction to lateral pressure profile for inner

monolayer (39) into eq. (S1) and integrating by  $z$  one can obtain the following expression in dimensionless form (see eq. (21)):

$$\kappa_m J = kT \sum_{n=0}^{\infty} \frac{a}{A_0} \frac{\int_0^{L_0} \frac{\partial^2 b^{(0)}}{\partial a^2} \cdot z^2 R_n^{(0)2}(z) dz}{b + c_n^4} \cdot J - kT \sum_{n=0}^{\infty} \frac{a}{A_0} \frac{\left( \int_0^{L_0} \frac{\partial b^{(0)}}{\partial a} z R_n^{(0)2}(z) dz \right)^2}{(b + c_n^4)^2} \cdot J, \quad (\text{S3})$$

where  $A = A_0 \cdot a$  - the area per lipid chain in a flat membrane.

Computing integrals in (S3) one can obtain the following analytic expression for bending modulus of monolayer:

$$\begin{aligned} \kappa_m &= \\ &= kT \frac{L_0^2}{A_0} a \frac{\partial^2 b}{\partial a^2} \left( \frac{1}{3b} + \sum_{n=1}^{\infty} \frac{I_2(n)}{b + c_n^4} \right) - \\ &- kT \frac{L_0^2}{A_0} a \left( \frac{\partial b}{\partial a} \right)^2 \left( \frac{1}{4b^2} + \sum_{n=1}^{\infty} \frac{I_1^2(n)}{(b + c_n^4)^2} \right) \end{aligned} \quad (\text{S4})$$

Here expressions for the integrals are represented in the form ( $c_n = \pi n - \frac{\pi}{4}$ ):

$$\int_0^{L_0} z R_n^{(0)2}(z) dz = L_0 \left( \frac{1}{2} + \frac{\sin(2c_n)}{2c_n} - \frac{\sin^2(c_n)}{2c_n^2} \right) = L_0 \cdot I_1(n) \quad (\text{S5})$$

$$\int_0^{L_0} z^2 R_n^{(0)2}(z) dz = \frac{L_0^2}{12} \left( 4 + \frac{3 \sin(2c_n)(2c_n^2 - 1)}{c_n^3} \right) = L_0^2 \cdot I_2(n) \quad (\text{S6})$$

Substituting expression for lateral pressure in the flat bilayer (14) into (S2) one can calculate the spontaneous bending moment for inner monolayer  $\kappa_m \cdot J_s$ :

$$\kappa_m J_s = \int_0^{L_0} z \Pi_t^{(0)}(z) dz = \frac{kT}{A_0} \sum_{n=0}^{\infty} \frac{\int_0^{L_0} \frac{\partial b^{(0)}}{\partial a} z R_n^{(0)2}(z) dz}{b + c_n^4} \quad (\text{S7})$$

And after the substituting (S5) into (S7) one can obtain the analytic formula for the spontaneous bending moment:

$$\kappa_m \cdot J_s = \frac{kT}{A_0} L_0 \cdot \frac{\partial b^{(0)}}{\partial a} \left( \frac{1}{2b} + \sum_{n=1}^{\infty} \frac{I_1(n)}{b + c_n^4} \right) \quad (\text{S8})$$
